# Supplementary material for: Ab initio conical intersections for the Si(1D) + H2 reaction system: a lowest five singlet states study
Source: Royal Society of Chemistry journal article supplement (doi:10.1039/c7ra01021d), 2017-01-01
Supplement: c7ra01021d1.pdf [file c7ra01021d1.pdf]

# Electronic Supplementary Information (ESI) for "Ab Initio Conical Intersections for the Si(<sup>1</sup>D)+H<sub>2</sub> Reaction System: A Lowest Five Singlet States Study"

Yanan Wu<sup>a,b</sup>, Chunfang Zhang<sup>a,b</sup> and Haitao Ma<sup>a,\*</sup>

<sup>a</sup> Beijing National Laboratory for Molecular Sciences, Institute of Chemistry, Chinese Academy of Sciences, Beijing 100190, China.

<sup>b</sup> University of Chinese Academy of Sciences, Beijing 100049, China.

E-mail: mht@iccas.ac.cn.

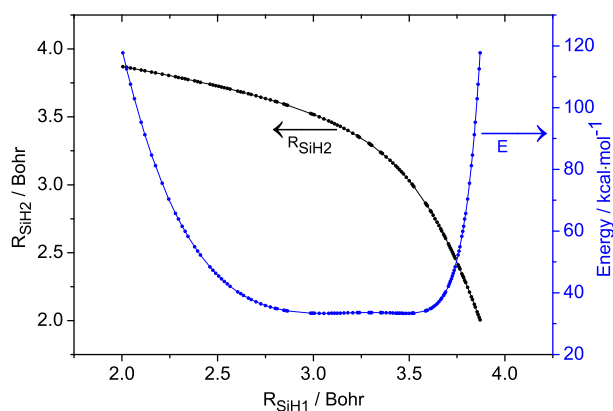

(a) The  $1^1A'(1^1A'')$ - $2^1A'(2^1A'')$  intersection at linear H-Si-H geometries.

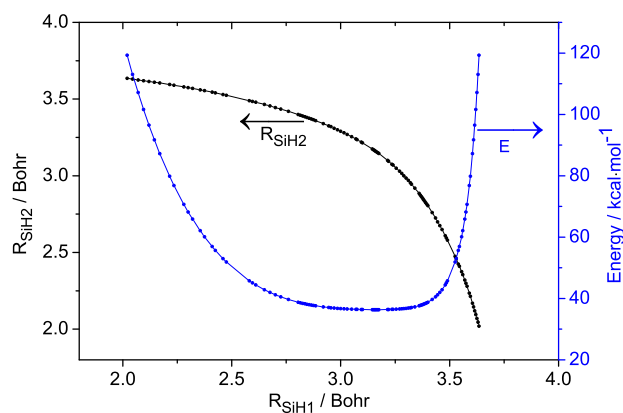

(b) The  $2^1A'(2^1A'')$ - $3^1A'(2^1A'')$  intersection at linear H-Si-H geometries.

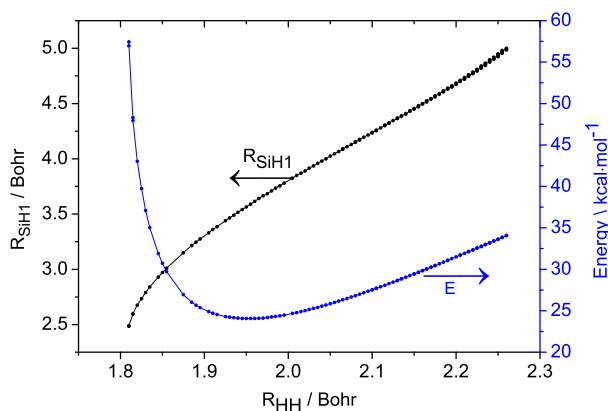

(c) The  $1^1A'(1^1A'')$ - $2^1A'(2^1A'')$  intersection at linear Si-H-H geometries.

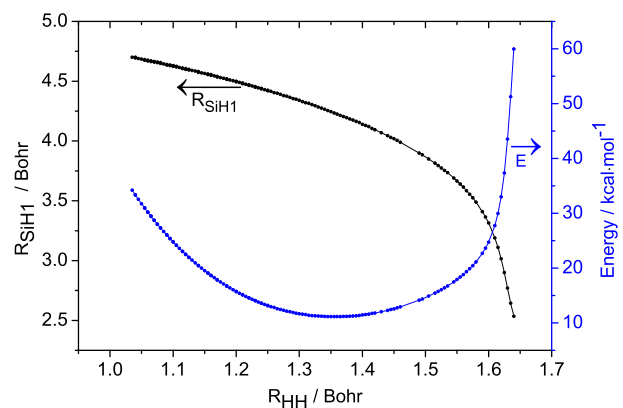

(d) The  $2^1A'(2^1A'')$ - $3^1A'(2^1A'')$  intersection at linear Si-H-H geometries.

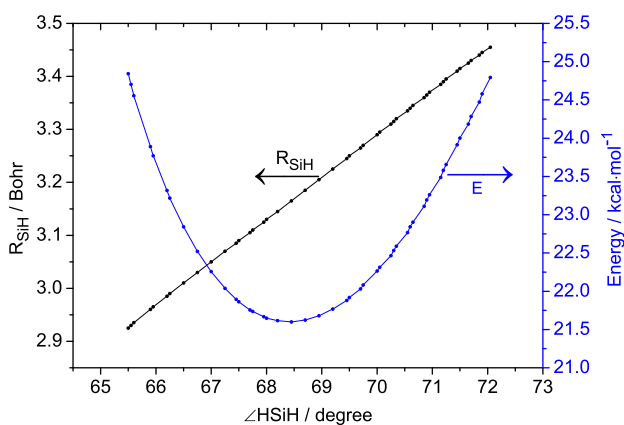

(e) The  $1^1A''$ - $2^1A''$  intersection at  $C_{2v}$  geometries.

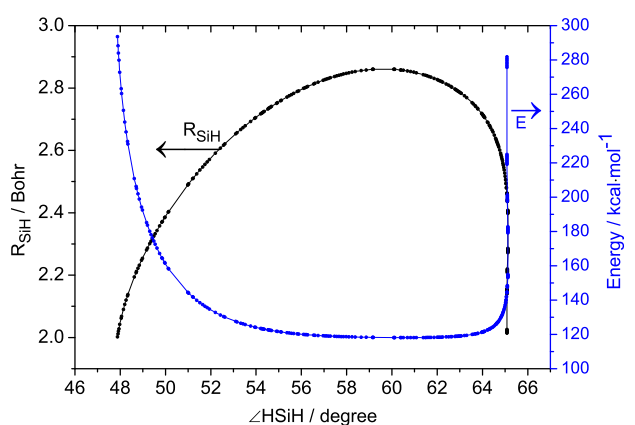

(f) The  $2^1A'$ - $3^1A'$  intersection at  $C_{2v}$  geometries.

**Fig S1.** The seam lines of the intersection at linear H-Si-H geometries(a,b), linear Si-H-H geometries(c,d) and  $C_{2v}$  geometries(e,f). The energies are relative to  $\text{Si}(^1D)+\text{H}_2$  asymptote.

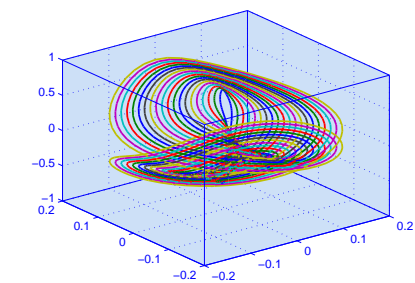

(g)  $1^1A'$  state in  $1^1A'(1^1A'')-2^1A'(2^1A'')$  intersection at linear H-Si-H geometries.

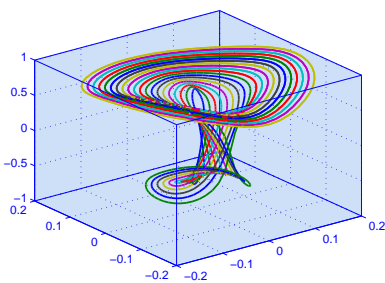

(h)  $2^1A'$  state in  $1^1A'(1^1A'')-2^1A'(2^1A'')$  intersection at linear H-Si-H geometries.

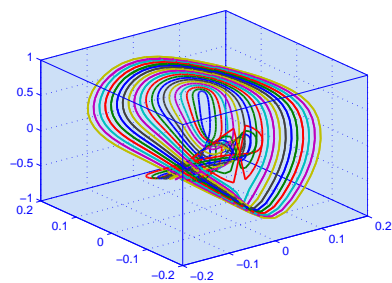

(i)  $2^1A'$  state in  $2^1A'(2^1A'')-3^1A'(2^1A'')$  intersection at linear H-Si-H geometries.

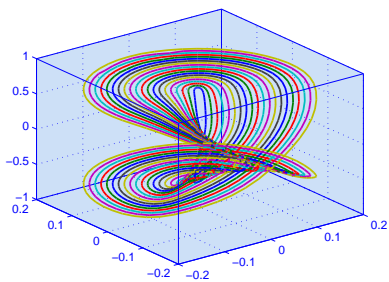

(j)  $3^1A'$  state in  $2^1A'(2^1A'')-3^1A'(2^1A'')$  intersection at linear H-Si-H geometries.

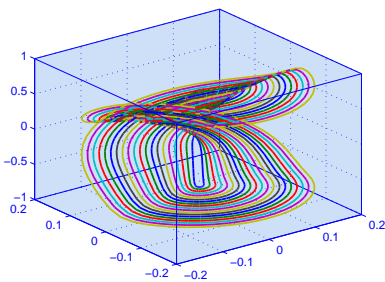

(k)  $1^1A'$  state in  $1^1A'(1^1A'')-2^1A'(2^1A'')$  intersection at linear Si-H-H geometries.

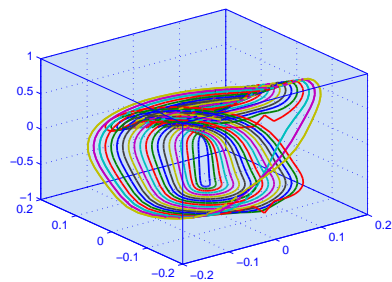

(l)  $2^1A'$  state in  $1^1A'(1^1A'')-2^1A'(2^1A'')$  intersection at linear Si-H-H geometries.

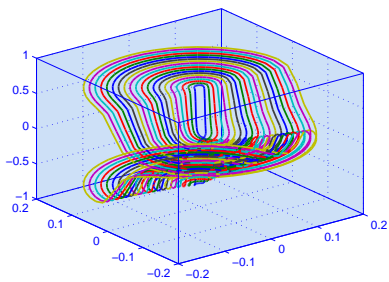

(m)  $2^1A'$  state in  $2^1A'(2^1A'')-3^1A'(2^1A'')$  intersection at linear Si-H-H geometries.

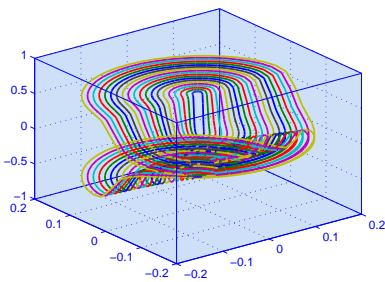

(n)  $3^1A'$  state in  $2^1A'(2^1A'')-3^1A'(2^1A'')$  intersection at linear Si-H-H geometries.

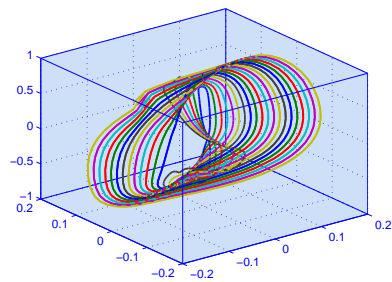

(o)  $1^1A''$  state in  $1^1A''-2^1A''$  intersection at  $C_{2v}$  geometries.

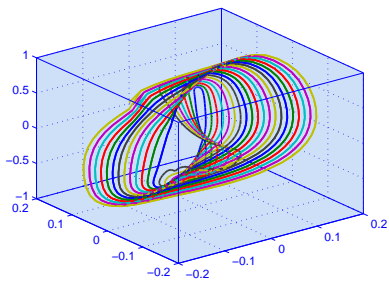

(p)  $2^1A''$  state in  $1^1A''-2^1A''$  intersection at  $C_{2v}$  geometries.

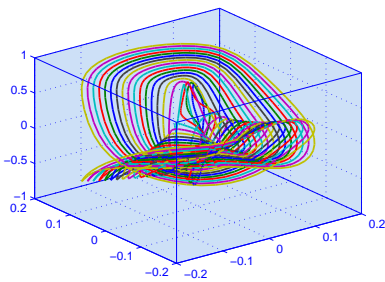

(q)  $2^1A'$  state in  $2^1A'-3^1A'$  intersection at  $C_{2v}$  geometries.

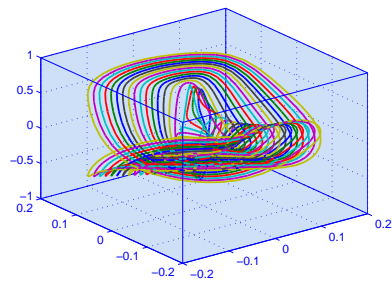

(r)  $3^1A'$  state in  $2^1A'-3^1A'$  intersection at  $C_{2v}$  geometries.

**Fig S2.** The geometric phase effects associated with the conical intersections in  $\text{Si}(^1\text{D})+\text{H}_2$  system.
